# Supplementary material for: A pan-cancer analysis of the oncogenic role of KIF13A in human tumors
Source: Research Square preprint supplement (doi:10.21203/rs.3.rs-7237847/v1), 2025-09-01
Supplement: Supplementary file 1 [file dd4104a9f759e25522329943.docx]

**1 Supplementary materials and methods**

**1.1 Gene mapping and protein structure**

Based on the UCSC Genome Browser for the human Dec. 2013 (GRCh38/hg38) assembly (http://genome.ucsc.edu/), we retrieved the genome location information for KIF13A. Furthermore, we employed the "HomoloGene" feature on the NCBI website (https://www.ncbi.nlm.nih.gov/homologene/) to examine the conserved functional domains of the KIF13A protein in various species. Using the constraint-based multiple alignment tool on the NCBI website (https://www.ncbi.nlm.nih.gov/tools/cobalt/), we constructed a phylogenetic tree for KIF13A spanning different species.

**1.2 Gene expression analysis**

We accessed the Human Protein Atlas (HPA) database (https://www.proteinatlas.org/humanproteome/pathology) to retrieve the expression data of KIF13A in various cells and tissues under normal conditions by searching for KIF13A. And the database provided the expression level of the KIF13A protein in a plasma sample, determined through mass spectrometry-based proteomics. The database defined "low specificity" as "NX (Normalized expression) ≥ 1 in at least one tissue/region/cell type but not elevated in any tissue/region/cell type". Subsequently, we accessed the gene profiler module of GENT2 at http://gent2.appex.kr/gent2/ to analyze the expression of KIF13A between tumor and normal tissues.

**1.3 Survival prognosis analysis**

We used the mRNA_genechip and mRNA_RNA-seq modules of Kaplan-Meier plotter (http://kmplot.com/analysis/) to analyze the survival prognosis of OS, DMFS, RFS, PPS, FP, DSS, and dPFS in cases of BRCA, OV, LUNG, STAD, and liver cancer. The cases were divided into two groups by setting the "autoselect best cutoff." Hazard ratio (HR), 95% confidence intervals, and log-rank P-value were calculated, and Kaplan-Meier survival plots were generated. Next, we utilized the Survival analysis model of GEPIA2 to analyze the survival prognosis of OS and RFS in 33 types of tumors. Finally, we accessed the RNA-seq Pan-cancer module of Kaplan-Meier Plotter to analyze the survival prognosis of OS and RFS in pan-cancer. The parameter was set to auto-select the best cutoff.

**1.4Correlation of *KIF13A* and TMB/MSI**

We accessed Sangerbox2 (http://past20.sangerbox.com/Index) and submitted "KIF13A" for analysis to investigate the potential correlation between KIF13A expression and TMB (tumor mutational burden) or MSI (microsatellite instability) in different types of tumors using TCGA datasets. The Spearman’s rank correlation test was performed, and we obtained the p-value and partial correlation (cor) value.

**1.5DNA methylation analysis**

We logged into DNMIVD (http://www.unimd.org/dnmivd/) and searched for the gene symbol KIF13A to conduct DMG (Differentially Methylated Genes) analysis for KIF13A across all cancers, as well as Meth-Exp correlation (Methylation-Expression correlation) analysis. We obtained a list of differentially methylated genes and calculated the Spearman correlation between methylation and FPKM in the promoter region. Finally, we used the R package ggradar to visualize the results.

**1.6 Phosphorylation feature prediction**

We accessed the open-access PhosphoNET database (http://www.phosphonet.ca/) and retrieved the predicted phosphorylation features of the S1698 sites by searching for the protein name KIF13A.

**Figure S1. Structural characteristics of KIF13A in different species.** (a) The genomic location of human KIF13A; and (b) Conserved domains of the KIF13A protein among various species.

**Figure S2. Phylogenetic tree of *KIF13A*** **in different species.** We utilized a constraint-based multiple alignment tool from NCBI to generate the phylogenetic tree of KIF13A across various species.

**Figure S3. Expression level of *KIF13A* in different cells, tissues and plasma in the normal physiological state.** We analyzed the expression of KIF13A in different tissues using the consensus datasets from HPA, GTEx, and FANTOM5 (a), as well as in different blood cells using HPA datasets, Monaco, and Schmiedel (b). KIF13A protein was detected in human plasma using immunoassays (c). Additionally, based on mass spectrometry data, we further analyzed the expression of KIF13A in plasma (d).

**Figure S4. Expression level of the *KIF13A* in different tumors and pathological stages.** (a) The expression statuses of KIF13A in BRCA, CESC, COAD, DLBC, ESCA, GBM, HNSC, KICH, KIRC, KIRP, LAML, LIHC, LUAD, LUSC, OV, PCPG, PRAD, READ, SARC, SKCM, STAD, TGCT, THCA, and THYM in the TCGA project were compared with the corresponding normal tissues in the GTEx databases. (b) The expression levels of KIF13A were compared among different pathological stages of ACC, BLCA, BRCA, CESC, DLBC, CHOL, ESCA, HNSC, KICH, KIRP, LICH, LUAD, LUSC, PAAD, READ, STAD, THCA, TGCT, UCEC, and UCS.

**Figure S5** The expression levels of KIF13A in various tumors by logging into "GENT2_gene profiler".

**Figure S6 Correlation between *KIF13A* expression and prognosis of cancers using the Kaplan-Meier plotter.** We utilized the Kaplan-Meier plotter to conduct a range of survival analyses, which included OS, DMFS, RFS, PFS, PPS, FP, and DSS, based on the expression levels of KIF13A in breast cancer (a), AML (b), HER2 negative breast cancer (c), Myeloma (d), ovarian cancer (e), colon cancer (f), lung cancer (g), and gastric cancer (h).

**Figure S7 Correlation analysis of *KIF13A* expression and prognosis of Pan-cancer cases (Kamplot-Meier Plotter).** We utilized the Kaplan-Meier plotter to conduct a series of survival analyses, including overall survival (OS) and relapse-free survival (RFS), based on the expression level of KIF13A in various types of cancer.

**Figure S8 Correlation between *KIF13A* expression and tumor mutational burden.** Based on the different tumors in TCGA, we investigated the potential correlation between KIF13A expression and tumor mutational burden (TMB). The p-value has been provided. The partial correlation values of +0.25 and -0.25 have been indicated.

**Figure S9. Correlation between *KIF13A* expression and microsatellite instability.** Based on the various tumors analyzed in TCGA, we researched the potential correlation between KIF13A expression and microsatellite instability (MSI). The p-value has been provided, and the partial correlation (cor) values of +0.47 and -0.47 have been marked.

**Figure** **S10 Differentially Methylated Genes for *KIF13A* in pan-cancer (DMG****).** The beta range is between 0.004 and -0.004. The definition of differentially methylated genes is as follows: |Beta difference| > 0.2 and independent Student's t-test adjusted p-value <= 0.05. Hypermethylation is when the beta difference is greater than 0.2 and the adjusted p-value is less than or equal to 0.05. Hypomethylation is when the beta difference is less than -0.2 and the adjusted p-value is less than or equal to 0.05.

**Figure S11 Methylation-Expression correlation for *KIF13A* in pan-cancer.** The Pearson r ranges from +0.23 to -0.23. It is a significant correlation when Pearson's r is less than 0.05.

**Figure S12. Correlation analysis between *KIF13A* expression and immune infiltration of CD8+ T-cells.** Different algorithms were employed to investigate the potential correlation between KIF13A expression and the level of CD8+ T cell infiltration across all types of cancer in The Cancer Genome Atlas (TCGA).

**Table S1** Subgroup analysis was conducted to examine the correlation between KIF13A expression and the prognosis of breast cancer cases using Kaplan-Meier plotter.

**Table S2** Subgroup analysis on the correlation of *KIF13A* expression and prognosis of lung cancer cases using Kaplan-Meier plotter.

**Table S3** Subgroup analysis was conducted to investigate the correlation between KIF13A expression and the prognosis of lung cancer cases using Kaplan-Meier plotter.

**Table S4** Subgroup analysis was conducted to examine the correlation between KIF13A expression and the prognosis of gastric cancer cases using Kaplan-Meier plotter.

**Table S5** Subgroup analysis of the correlation between KIF13A expression and the prognosis of liver cancer cases using Kaplan-Meier plotter.

**Table S6** Analysis of KIF13A phosphorylation sites identified by CPTAC through the PhosphoNET database .

**Table S7** Correlation analysis of KIF13A expression and the prognosis of pan-cancer cases (Kaplan-Meier Plotter).

**Table S8** Correlation analysis of KIF13A expression and prognosis in pan-cancer cases was conducted using GEPIA2.
