# Supplementary material for: A pan-cancer analysis of the oncogenic role of KIF13A in human tumors
Source: Research Square preprint supplement (doi:10.21203/rs.3.rs-7237847/v1), 2025-09-01
Supplement: Supplementary file 2 [file eb6b1d9f84e51c81534b347c.docx]

Table S1. Subgroup analysis was conducted to examine the correlation between KIF13A expression and the prognosis of breast cancer cases (Kaplan-Meier plotter).

| **Factor** | **Subgroup** | **Sample**  **size** | **OS** | | **RFS** | | **DMFS** | | **PPS** | |
| --- | --- | --- | --- | --- | --- | --- | --- | --- | --- | --- |
| **HR** | ***P*** | **HR** | ***P*** | **HR** | ***P*** | ***HR*** | ***P*** |
| breast cancer | all | / | 0.57 | **0.0002** | 0.63 | **1.8e-9** | 0.72 | **0.0126** | 0.67 | **0.0405** |
| ER status-IHC | ER positive | 3499 | 0.63 | 0.1726 | 0.75 | 0.0615 | 1.71 | 0.217 | 0.76 | 0.5756 |
|  | ER negative | 2168 | 0.61 | **0.0293** | 1.26 | 0.1616 | 1.29 | 0.2413 | 0.4 | **0.0191** |
| ER status-array | ER positive | 5526 | 0.6 | **0.0092** | 0.59 | **1.0e-7** | 0;69 | 0.0582 | 0.67 | 0.0842 |
|  | ER negative | 2009 | 0.83 | 0.3363 | 1.1 | 0.4753 | 1.26 | **0.225**4 | 0.72 | 0.3345 |
| TP53 status | mutated | 272 | 0.46 | 0.3254 | 0.64 | 0.1774 | 0.25 | 0.0524 | 4.76 | **0.049** |
|  | Wild type | 388 | NA | NA | 0.48 | 0.1394 | NA | NA | NA | NA |
| PR status-IHC | PR positive | 954 | NA | NA | 0.81 | 0.2733 | 1.6 | 0.4174 | NA | NA |
|  | PR negative | 1028 | 0.65 | 0.2045 | 1.29 | 0.1557 | 1.49 | 0.0797 | NA | NA |
| HER2 status-array | HER2 positive | 1273 | 1.3 | 0.3266 | 0.82 | 0.1926 | 1.65 | **0.048**8 | 1.51 | 0.2174 |
|  | HER2 negative | 6262 | 0.52 | **8.9e-5** | 0.55 | **4.8e-11** | 0.56 | **0.0005** | 0.62 | **0.0314** |
| Grade | Grade 1 | 576 | 1.1e+9 | 0.1586 | 2.67 | 0.0675 | NA | NA | 0.24 | 0.2072 |
|  | Grade 2 | 1795 | 0.31 | **0.0369** | 0.79 | 0.3895 | 0.36 | **0.0241** | 0.24 | 0.0843 |
|  | Grade 3 | 2058 | 0.56 | **0.0375** | 0.78 | 0.1297 | 1.79 | **0.0302** | 1.33 | 0.3422 |
| Subtype-StGallen | Basal | 1949 | 0.67 | 0.0914 | 0.78 | 0.1055 | 0.59 | **0.0298** | 0.5 | 0.1867 |
|  | Luminal A | 3511 | 0.56 | **0.0227** | 0.56 | **5.2e-6** | 0.56 | **0.0309** | 0.58 | 0.078 |
|  | Luminal B | 2015 | 0.61 | 0.1558 | 0.7 | **0.0211** | 1.5 | 0.2416 | 0.54 | 0.1242 |
|  | HER2+ | 515 | 1.58 | 0.1886 | 1.5 | 0.0772 | 2.2 | **0.008** | 0.54 | 0.1601 |
| Lymph node status | Lymph node positive | 2153 | 0.59 | **0.035** | 0.65 | 0.0006 | 0.64 | 0.1053 | 0.72 | 0.3475 |
|  | Lymph node negative | 2829 | 0.27 | **0.0014** | 0.69 | 0.0578 | 0.54 | 0.0817 | 0.4 | 0.1713 |
| Pietenpol subtype | Basal-like 1 | 418 | 0.25 | **0.0046** | 0.55 | **0.0421** | 0.35 | **0.0209** | 0 | 0.0784 |
|  | Basal-like 2 | 165 | 0.35 | 0.1524 | 0.46 | 0.0881 | 0.46 | 0.1249 | NA | NA |
|  | immunomodulatory | 462 | 0.45 | 0.178 | 0.42 | 0.1001 | 0.6 | 0.3542 | 0 | **0.0082** |
|  | Mesenchymal | 382 | 0.56 | 0.1362 | 0.63 | 0.1166 | 0.41 | 0.0928 | 0.29 | 0.0652 |
|  | Mesenchymal stem-like | 201 | 3.61 | 0.1868 | 1.69 | 0.2616 | 0.52 | 0.2275 | NA | NA |
|  | Luminal androgen receptor | 413 | 0.53 | 0.2124 | 0.41 | **0.0072** | 1.61 | 0.2865 | 0.48 | 0.2985 |

HR, hazard ratio; OS, overall survival; RFS, relapse free survival; DMFS, distant metastasis free survival;

ER, Estrogen receptor; PR, Progesterone receptor; HER2, human epidermal growth factor receptor-2;

TP53, Tumor Protein P53; NA, not available data; *P* value less than 0.05 is shown in bold.

Table S2. Subgroup analysis was conducted to examine the correlation between KIF13A expression and the prognosis of lung cancer cases(Kaplan-Meier plotter).

| **Factor** | **Subgroup** | **Sample size** | **OS** | | **FP** | | **PPS** | |
| --- | --- | --- | --- | --- | --- | --- | --- | --- |
| **HR** | ***P*** | **HR** | **P** | ***HR*** | **P** |
| lung cancer | **All** | / | 0.39 | **1e-16** | 0.51 | **1.1e-5** | 0.4 | **2.3e-5** |
| Histology | **adenocarcinoma** | 865 | 0.31 | **9.7e-16** | 0.32 | **8.4e-7** | 0.43 | **0.0007** |
|  | **squamous cell carcinoma** | 675 | 0.74 | 0.0934 | 1.61 | 0.0661 | 1.72 | 0.3449 |
| gender | **Female** | 817 | 0.33 | **6.8e-7** | 0.44 | **0.0041** | 0.33 | **0.0021** |
|  | **male** | 1387 | 0.41 | **6.3e-10** | 0.47 | **0.0003** | 0.45 | **0.0031** |
| smoking history | **exclude those never smoked** | 970 | 0.36 | **4.0e-6** | 0.6 | **0.0113** | 0.44 | **0.0021** |
|  | **only those never smoked** | 247 | 0.18 | **0.0082** | 0.21 | **0.0003** | 2.12 | 0.0898 |
| stage | **stage I** | 652 | 0.24 | **9.5e-15** | 0.16 | **5.5e-6** | 0.3 | **4.5e-5** |
|  | **stage II** | 320 | **0.41** | **5.1e-5** | 1.76 | 0.0727 | 0.48 | **0.0296** |
|  | **stage III** | 70 | 0.61 | 0.1661 | NA | NA | NA | NA |
| grade | **grade I** | 202 | NA | NA | NA | NA | NA | NA |
|  | **grade II** | 310 | NA | NA | NA | NA | NA | NA |
|  | **grade III** | 77 | NA | NA | NA | NA | NA | NA |
| AJCC stage t | **t1** | 475 | 0.46 | **0.0006** | 1.96 | 0.3348 | 0.4 | 0.3049 |
|  | **t2** | 686 | 0.73 | 0.1153 | 2.19 | **0.0105** | 0.45 | 0.0806 |
|  | **t3** | 99 | 0.39 | **0.038** | NA | NA | NA | NA |
|  | **t4** | 48 | 0.71 | 0.4294 | NA | NA | NA | NA |
| AJCC stage n | **n0** | 863 | 0.59 | **0.0018** | 1.79 | 0.0963 | 0.48 | 0.1015 |
|  | **n1** | 296 | 0.61 | 0.1 | 1.95 | 0.1564 | 0.3 | 0.1358 |
|  | **n2** | 113 | 0.42 | **0.031** | NA | NA | NA | NA |
| AJCC stage m | **m0** | 818 | 0.6 | **0.0001** | 1.72 | 0.053 | 0.45 | **0.0315** |
| surgery | **only surgical margins negative** | 730 | 0.16 | **0.0004** | 0.17 | **2.8e-6** | 0.67 | 0.4134 |
| radiotherapy | **no** | 276 | NA | NA | NA | NA | NA | NA |
|  | **yes** | 73 | NA | NA | NA | NA | NA | NA |
| chemotherapy | **no** | 317 | 0.11 | **0.0024** | 0.13 | **0.0005** | 0.43 | 0.4547 |
|  | **yes** | 178 | 2.84 | 0.103 | 2.21 | 0.1324 | 2.95 | 0.2937 |

HR, hazard ratio; AJCC，American Joint Committee on Cancer; OS, overall survival; FP, first progression; PPS, post progression survival; NA, not available data; *P* value less than 0.05 is shown in bold.

Table S3. Subgroup analysis was conducted to examine the correlation between KIF13A expression and the prognosis of ovarian cancer cases(Kaplan-Meier plotter).

| **Factor** | **Subgroup** | **Sample size** | **OS** | | **PFS** | | **PPS** | |
| --- | --- | --- | --- | --- | --- | --- | --- | --- |
| **HR** | ***p*** | **HR** | ***p*** | **HR** | ***p*** |
| ovarian cancer | All | / | 1.35 | **0.005** | 1.45 | **0.0002** | 1.34 | **0.0262** |
| Histology | Endometrioid | 62 | 1.7e+9 | **0.0434** | 3.56 | **0.0274** | NA | NA |
|  | Serous | 1232 | 1.32 | **0.0286** | 1.28 | **0.0195** | 1.39 | **0.0159** |
| Stage | Stage 1 | 107 | 3.85 | **0.0421** | 0.29 | **0.0419** | NA | NA |
|  | Stage 2 | 72 | 8.74 | **0.0173** | 4.29 | **0.0429** | 2.8e+9 | **0.0126** |
|  | Stage 3 | 1079 | 1.24 | 0.1025 | 1.25 | **0.05** | 1.16 | 0.2861 |
|  | Stage 4 | 189 | 1.2 | 0.5367 | 1.25 | **0.416** | 1.19 | 0.5995 |
| Grade | Grade 1 | 56 | 2.76 | 0.1261 | 0.37 | 0.1199 | NA | NA |
|  | Grade 2 | 325 | 1.73 | **0.0272** | 1.51 | 0.0558 | 1.56 | 0.0912 |
|  | Grade 3 | 1024 | 1.16 | 0.2868 | 1.25 | 0.0977 | 1.24 | 0.186 |
|  | Grade 4 | 21 | 0.47 | 0.1985 | NA | NA | NA | NA |
| TP53 mutation | Mutated | 516 | 0.63 | **0.0286** | 0.77 | 0.2059 | 0.72 | 0.1229 |
|  | Wild type | 102 | 3.86 | 0.0661 | 2.81 | 0.0803 | 2.26 | 0.1381 |
| Debulk | optimal | 802 | 1.76 | **0.0073** | 1.7 | **0.0013** | 1.81 | **0.0168** |
|  | suboptimal | 536 | 0.83 | 0.2924 | 0.89 | 0.4604 | 1.34 | 0.0754 |
| Chemotherapy | Contains platin | 1438 | 1.34 | **0.0211** | 1.23 | **0.0427** | 1.27 | 0.0663 |
|  | Contains Taxol | 821 | 1.41 | **0.0285** | 1.28 | **0.0303** | 1.26 | 0.14 |
|  | Contains Taxol+platin | 804 | 1.4 | **0.0309** | 1.29 | **0.0266** | 0.15 | 0.1524 |
|  | Contains Avastin | 50 | NA | NA | NA | NA | NA | NA |
|  | Contains Docetaxel | 108 | NA | NA | NA | NA | NA | NA |
|  | Contains Gemcitabine | 135 | NA | NA | NA | NA | NA | NA |
|  | Contains Paclitaxel | 248 | NA | NA | 0.62 | 0.2826 | NA | NA |
|  | Contains Topotecan | 119 | NA | NA | NA | NA | NA | NA |

HR, hazard ratio; OS, overall survival; PFS, progress free survival; PPS, post progression survival;

TP53, Tumor Protein P53; NA, not available data; *P* value less than 0.05 is shown in bold.

Table S4. Subgroup analysis was conducted to examine the correlation between KIF13A expression and the prognosis of gastric cancer cases.(Kaplan-Meier plotter).

| **Factor** | **Subgroup** | **Sample size** | **OS** | | **FP** | | **PPS** | |
| --- | --- | --- | --- | --- | --- | --- | --- | --- |
| **HR** | ***P*** | **HR** | ***P*** | **HR** | ***P*** |
| gastric cancer |  | / | 0.69 | **0.0025** | 0.69 | **0.0062** | 0.79 | 0.1528 |
| Gender | Female | 244 | 0.81 | **0.3616** | 0.75 | **0.2029** | 1.55 | 0.0965 |
|  | Male | 567 | 0.65 | **0.0047** | 0.68 | **0.0095** | 0.68 | **0.0388** |
| Stage | Stage 1 | 69 | 0.18 | **0.0007** | 0.17 | **0.0003** | 0.4 | 0.2105 |
|  | Stage 2 | 145 | 0.42 | **0.034** | 0.41 | **0.02** | 0.37 | **0.0229** |
|  | Stage 3 | 319 | 0.79 | 0.2165 | 1.25 | **0.2417** | 1.21 | 0.4183 |
|  | Stage 4 | 152 | 0.57 | **0.014** | 0.54 | **0.0081** | 0.7 | 0.1626 |
| Stage t | T1 | 14 | NA | NA | NA | NA | NA | NA |
|  | T2 | 253 | 0.64 | **0.0369** | 0.58 | **0.0253** | 0.63 | 0.1091 |
|  | T3 | 208 | 0.84 | 0.3771 | 0.82 | 0.2846 | 1.38 | 0.1042 |
|  | T4 | 39 | 0.34 | **0.0323** | 0.41 | **0.0521** | 1.73 | 0.3683 |
| Stage n | n0 | 76 | 0.64 | 0.2964 | 0.59 | 0.2244 | 3.66 | **0.0217** |
|  | n1 | 232 | 0.46 | **0.0028** | 0.42 | **0.0009** | 0.45 | **0.008** |
|  | n2 | 129 | 1.34 | 0.2203 | 1.3 | 0.2414 | 1.38 | 0.1814 |
|  | n3 | 76 | 0.65 | 0.162 | 0.58 | 0.0866 | 1.46 | 0.2401 |
| Stage m | m0 | 459 | 0.75 | 0.0642 | 0.7 | **0.0184** | 0.83 | 0.2598 |
|  | m1 | 58 | 0.63 | 0.1728 | 0.54 | 0.0662 | 1.82 | 0.103 |
| HER2 | negative | 641 | 0.66 | **0.007** | 0.74 | 0.0649 | 0.84 | 0.3028 |
|  | positive | 425 | 0.68 | 0.0681 | 0.55 | **0.0136** | 0.55 | 0.0509 |
| Lauren classification | Instestinal | 336 | 0.55 | **0.0086** | 0.53 | **0.0048** | 0.62 | 0.0612 |
|  | Diffuse | 248 | 0.76 | 0.1436 | 0.8 | 0.2197 | 1.38 | 0.1162 |
|  | Mixed | 33 | 3.95 | 0.1568 | 0.34 | 0.0863 | NA | NA |
| Differentiation | Poorly | 166 | 0.8 | **0.4044** | 0.81 | 0.416 | 1.68 | 0.1132 |
|  | Moderately | 67 | 0.41 | **0.0133** | 0.43 | **0.0155** | 0.45 | 0.1205 |
|  | Well | 32 | NA | NA | NA | NA | NA | NA |
| Treatment | Surgery alone | 393 | 0.86 | 0.383 | 0.8 | 0.1696 | 1.43 | **0.0368** |
|  | 5-Fu based adjuvant | 157 | 1.75 | 0.2329 | 1.93 | 0.1195 | 0.61 | 0.3697 |
|  | other adjuvant | 80 | 0.57 | 0.2124 | 0.5 | 0.0922 | 0.4 | **0.0481** |
| Perforation | No | 169 | 0.71 | 0.1262 | 0.7 | 0.1006 | 1.57 | 0.1075 |
|  | Yes | 4 | NA | NA | NA | NA | NA | NA |

HR, hazard ratio; OS, overall survival; FP, first progression; PPS, post progression survival;

HER2, human epidermal growth factor receptor-2; NA, not available data; *P* value less than 0.05 is shown in bold.

Table S5. Subgroup analysis was conducted to examine the correlation between KIF13A expression and the prognosis of liver cancer cases(Kaplan-Meier plotter).

| **Factor** | **Subgroup** | **Sample size** | **OS** | | **PFS** | | **RFS** | | **DSS** | |
| --- | --- | --- | --- | --- | --- | --- | --- | --- | --- | --- |
| **HR** | ***P*** | **HR** | ***P*** | **HR** | ***P*** | **HR** | ***P*** |
| Liver cancer | All | / | 1.22 | 0.3124 | 1.25 | 0.1556 | 1.24 | 0.2436 | 1.3 | 0.2836 |
| Stage | Stage 1 | 171 | 1.36 | 0.3344 | 1.29 | 0.3292 | 0.77 | 0.3666 | 0.65 | 0.3475 |
|  | Stage 2 | 86 | 1.71 | 0.1777 | 1.43 | 0.3264 | 0.78 | 0.4754 | 2.77 | 0.1669 |
|  | Stage 3 | 85 | 0.63 | 0.1331 | 0.65 | 0.1176 | 0.73 | 0.3002 | 0.58 | 0.1417 |
| Grade | Grade 1 | 55 | 2.25 | 0.1164 | 0.4 | **0.0211** | 0.41 | 0.0637 | 3.2 | 0.0645 |
|  | Grade 2 | 177 | 1.29 | 0.3292 | 0.69 | 0.1546 | 0.59 | 0.0676 | 0.67 | 0.2281 |
|  | Grade 3 | 122 | 1.3 | 0.4279 | 0.45 | **0.0024** | 2.85 | **0.0002** | 1.61 | 0.2186 |
| AJCC_T | T1 | 181 | 0.66 | 0.2343 | 1.4 | 0.2 | 0.78 | 0.3859 | 1.83 | 0.1397 |
|  | T2 | 94 | 0.43 | **0.0214** | 1.52 | 0.2395 | 1.34 | 0.4493 | 3.34 | 0.0904 |
|  | T3 | 80 | 0.49 | **0.0261** | 0.64 | 0.1257 | 0.72 | 0.3046 | 0.59 | 0.1625 |
| Gender | Female | 121 | 1.83 | **0.05** | 1.93 | **0.013** | 1.68 | 0.088 | 2.63 | **0.011** |
|  | Male | 250 | 0.22 | 0.2193 | 0.77 | 0.16 | 0.73 | 0.12 | 0.68 | 0.19 |
| Vascular invasion | None | 205 | 1.68 | 0.056 | 1.61 | **0.043** | 1.6 | 0.067 | 2.09 | **0.046** |
|  | micro | 93 | 1.45 | 0.35 | 0.71 | 0.26 | 0.57 | 0.11 | 0.29 | 0.083 |
| Race | White | 184 | 1.6 | 0.057 | 1.45 | 0.098 | 1.49 | 0.11 | 1.96 | **0.022** |
|  | Asian | 158 | 0.75 | 0.33 | 0.76 | 0.25 | 0.72 | 0.21 | 0.53 | 0.11 |
| Sorafenib treatment | treated | 30 | 0.19 | **0.013** | 0.32 | **0.006** | 0.26 | **0.0068** | 0.19 | **0.013** |
| Alcohol consumption | Yes | 117 | 1.66 | 0.14 | 1.46 | 0.16 | 1.66 | 0.094 | 1.88 | 0.097 |
|  | none | 205 | 1.23 | **0.039** | 1.34 | 0.18 | 0.68 | 0.099 | 0.63 | 0.17 |
| Hepatitis virus | Yes | 153 | 1.65 | 0.14 | 1.86 | **0.011** | 1.62 | 0.063 | 1.85 | 0.15 |
|  | none | 169 | 0.68 | 0.099 | 0.76 | 0.23 | 0.67 | 0.13 | 0.62 | 0.098 |

HR, hazard ratio; AJCC，American Joint Committee on Cancer; OS, overall survival; PFS, progress free survival;

RFS, relapse free survival; DSS, disease specific surviva; NA, not available data; *P* value less than 0.05 is shown in bold.

Table S6. Analysis of KIF13A phosphorylation sites identified by CPTAC through the PhosphoNET database.

| **site** | **sequence** | **experimentally confirmed#** | **hydrophobicity** | **p-site similarity score** | **maximum kinase specificity** | **sum kinase specificity score** | **conservation score** |
| --- | --- | --- | --- | --- | --- | --- | --- |
| S363 | NA | NA | NA | NA | NA | NA | NA |
| S636 | EQLRQQL**S**PDRQPQS | 23186163 | -2.153 | -54.5 | 558 | 21,895 | 17.0 |
| S1283 | ANIYNKQ**S**FTQSLKR | NA | -1.240 | -61.8 | 354 | 16,127 | 17.6 |
| T1285 | IYNKQSFTQSLKRRI | 20068231 | -1.127 | -60.5 | 321 | 2190 | 19.1 |
| T1447 | KEGCTSETPHALTVS | NA | -0.607 | -57.5 | 245 | 8165 | 8.2 |
| S1529 | KREKKIDSEEEENEL | 23186163 | -2.500 | -55.1 | 373 | 13,573 | 8.2 |
| S1682 | LAKGSPSSQSIPEKN | NA | -1.213 | -53.5 | 558 | 14519 | 1.2 |
| S1698 | KSL CRTG**S**CSELDAC | 19664995 | -0.293 | -58.5 | 511 | 22,250 | 6.7 |
| S1700 | LCRTGSCSELDACPS | NA | -0.140 | -59.9 | 373 | 16297 | 6.7 |

*#*The PMID (PubMed Unique Identifier) information of the publication was provided; NA, not available.

Table S7. Subgroup analysis of the correlation between KIF13A expression and the prognosis of liver cancer cases using Kaplan-Meier plotter.

| **Cancer category** | **Sample**  **size** | **OS** | | **RFS** | |
| --- | --- | --- | --- | --- | --- |
| **HR** | ***P*** | **HR** | ***P*** |
| Bladder Carcinoma | 405 | 1.38 | **0.039** | 0.7 | 0.330 |
| Breast cancer (BRCA) | 1090 | 0.72 | 0.1 | 0.52 | **0.0022** |
| Cervical squamous cell carcinoma | 304 | 0.69 | 0.146 | 0.54 | 0.11 |
| Esophageal Adenocarcinoma (EAC) | 80 | 0.51 | **0.0421** | 0.1 | 0.045 |
| Esophageal Squamous Cell Carcinoma (ESSC) | 81 | 0.68 | 0.3321 | 2.8 | **0.028** |
| Head-neck squamous cell carcinoma | 500 | 0.8 | 0.1444 | 1.6 | 0.3 |
| Kidney renal clear cell carcinoma (KIRC) | 530 | 0.45 | **5.1e-7** | 0.67 | 0.54 |
| Kidney renal papillary cell carcinoma (KIRP) | 288 | 2.18 | **0.0093** | 3.16 | **0.0159** |
| Liver hepatocellular carcinoma (LIHC) | 371 | 1.83 | **0.0006** | 1.45 | **0.0405** |
| Lung adenocarcinoma (LUAD) | 513 | 0.71 | 0.0654 | 0.41 | **0.0032** |
| Lung squamous cell carcinoma (LUSC) | 501 | 1.19 | 0.2309 | 1.49 | 0.1279 |
| Ovarian cancer (OV) | 374 | 0.67 | **0.0057** | 0.56 | **0.0039** |
| Pancreatic ductal adenocarcinoma | 177 | 0.72 | **0.127** | 2.41 | 0.0561 |
| Pheochromocytoma and Paraganglioma | 178 | 2.41 | 0.2701 | 0 | 0.063 |
| Rectum adenocarcinoma (READ) | 165 | 0.33 | **0.0035** | 1.64 | 0.54 |
| Sarcoma | 259 | 1.32 | 0.202 | 1.43 | 0.162 |
| Stomach adenocarcinoma (STAD) | 375 | 0.68 | **0.0217** | 0.55 | 0.082 |
| Testicular Germ Cell Tumor (TGCT) | 134 | 0.38 | 0.3173 | 0.39 | **0.024** |
| Thymoma (THYM) | 119 | 4.57 | **0.0196** | NA | NA |
| Thyroid carcinoma | 502 | 0.46 | 0.1141 | 0.45 | 0.0636 |
| Uterine corpus endometrial carcinoma (UCEC) | 543 | 1.3 | 0.2184 | 1.26 | 0.3943 |

HR, hazard ratio; OS, overall survival; RFS, relapse free survival; NA, not available data; *P* value less than 0.05 is shown in bold.

Table S8. Correlation analysis of KIF13A expression and prognosis in pan-cancer cases was conducted using GEPIA2.

| **Cancer category** | **Sample**  **size** | **OS** | | **RFS** | |
| --- | --- | --- | --- | --- | --- |
| **HR(high)** | ***P*** | **HR(high)** | ***P*** |
| ACC | n(high)=38/n(low)=38 | 1 | 0.91 | 1.2 | 0.65 |
| BLCA | n(high)=201/n(low)=201 | 1 | 0.89 | 1.1 | 0.6 |
| BRCA | n(high)=534/n(low)=534 | 1 | 0.89 | 0.7 | 0.062 |
| CESC | n(high)=146/n(low)=146 | 1.1 | 0.73 | 0.65 | 0.14 |
| CHOL | n(high)=18/n(low)=18 | 1.9 | 0.18 | 1.1 | 0.82 |
| COAD | n(high)=135/n(low)=135 | 0.8 | 0.36 | 0.58 | **0.027** |
| DLBC | n(high)=23/n(low)=23 | 0.5 | 0.33 | 1.4 | 0.58 |
| ESCA | n(high)=91/n(low)=91 | 1.1 | 0.79 | 0.93 | 0.75 |
| GBM | n(high)=81/n(low)=81 | 1 | 0.84 | 1.1 | 0.62 |
| HNSC | n(high)=259/n(low)=259 | 0.96 | 0.77 | 0.84 | 0.29 |
| KICH | n(high)=32/n(low)=32 | 8.4 | **0.017** | 4.3 | **0.05** |
| KIRC | n(high)=258/n(low)=258 | 0.55 | **0.00015** | 0.74 | 0.11 |
| KIRP | n(high)=141/n(low)=140 | 1 | 0.88 | 1.2 | 0.51 |
| LAML | n(high)=53/n(low)=53 | 1.1 | 0.76 | 1 | 1 |
| LGG | n(high)=257/n(low)=257 | 0.42 | **1.8e−06** | 0.57 | **0.00038** |
| LIHC | n(high)=181/n(low)=180 | 1.8 | **0.0017** | 1.2 | 0.31 |
| LUAD | n(high)=239/n(low)=239 | 0.94 | **0.67** | 0.87 | 0.37 |
| LUSC | n(high)=241/n(low)=241 | 1.2 | 0.24 | 1.3 | 0.15 |
| MESO | n(high)=41/n(low)=41 | 0.66 | 0.08 | 0.75 | 0.32 |
| OV | n(high)=211/n(low)=212 | 0.97 | 0.8 | 0.83 | 0.12 |
| PAAD | n(high)=89/n(low)=89 | 1.1 | 0.82 | 0.98 | 0.94 |
| PCPG | n(high)=91/n(low)=91 | 1.8 | 0.48 | 1.2 | 0.76 |
| PRAD | n(high)=245/n(low)=245 | 0.75 | 0.65 | 0.66 | 0.054 |
| READ | n(high)=46/n(low)=46 | 0.32 | **0.024** | 1.9 | 0.2 |
| SARC | n(high)=131/n(low)=131 | 1.1 | 0.65 | 1.1 | 0.49 |
| SKCM | n(high)=229/n(low)=228 | 1.1 | 0.56 | 1.1 | 0.54 |
| STAD | n(high)=192/n(low)=192 | 0.91 | 0.55 | 0.78 | 0.2 |
| TGCT | n(high)=68/n(low)=68 | 1 | 0.97 | 1 | 0.98 |
| THCA | n(high)=255/n(low)=255 | 1 | 1 | 0.78 | 0.39 |
| THYM | n(high)=59/n(low)=59 | 3.7 | 0.088 | 0.92 | 0.85 |
| UCEC | n(high)=86/n(low)=86 | 1.5 | 0.23 | 0.9 | 0.74 |
| UCS | n(high)=28/n(low)=28 | 0.8 | 0.51 | 0.99 | 0.98 |
| UVM | n(high)=39/n(low)=39 | 0.72 | 0.47 | 2 | 0.16 |

HR, hazard ratio; OS, overall survival; RFS, relapse free survival;

NA, not available data; *P* value less than 0.05 is shown in bold.
