# Supplementary figures and images for: A pan-cancer analysis of the oncogenic role of KIF13A in human tumors
Source: Research Square preprint supplement (doi:10.21203/rs.3.rs-7237847/v1), 2025-09-01

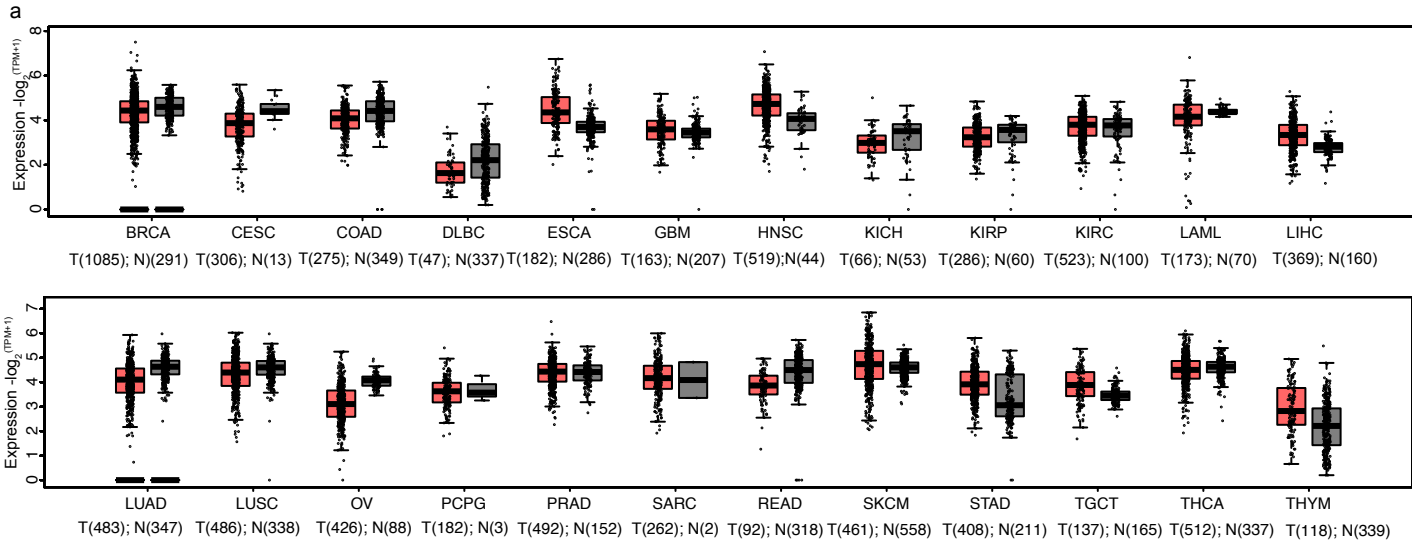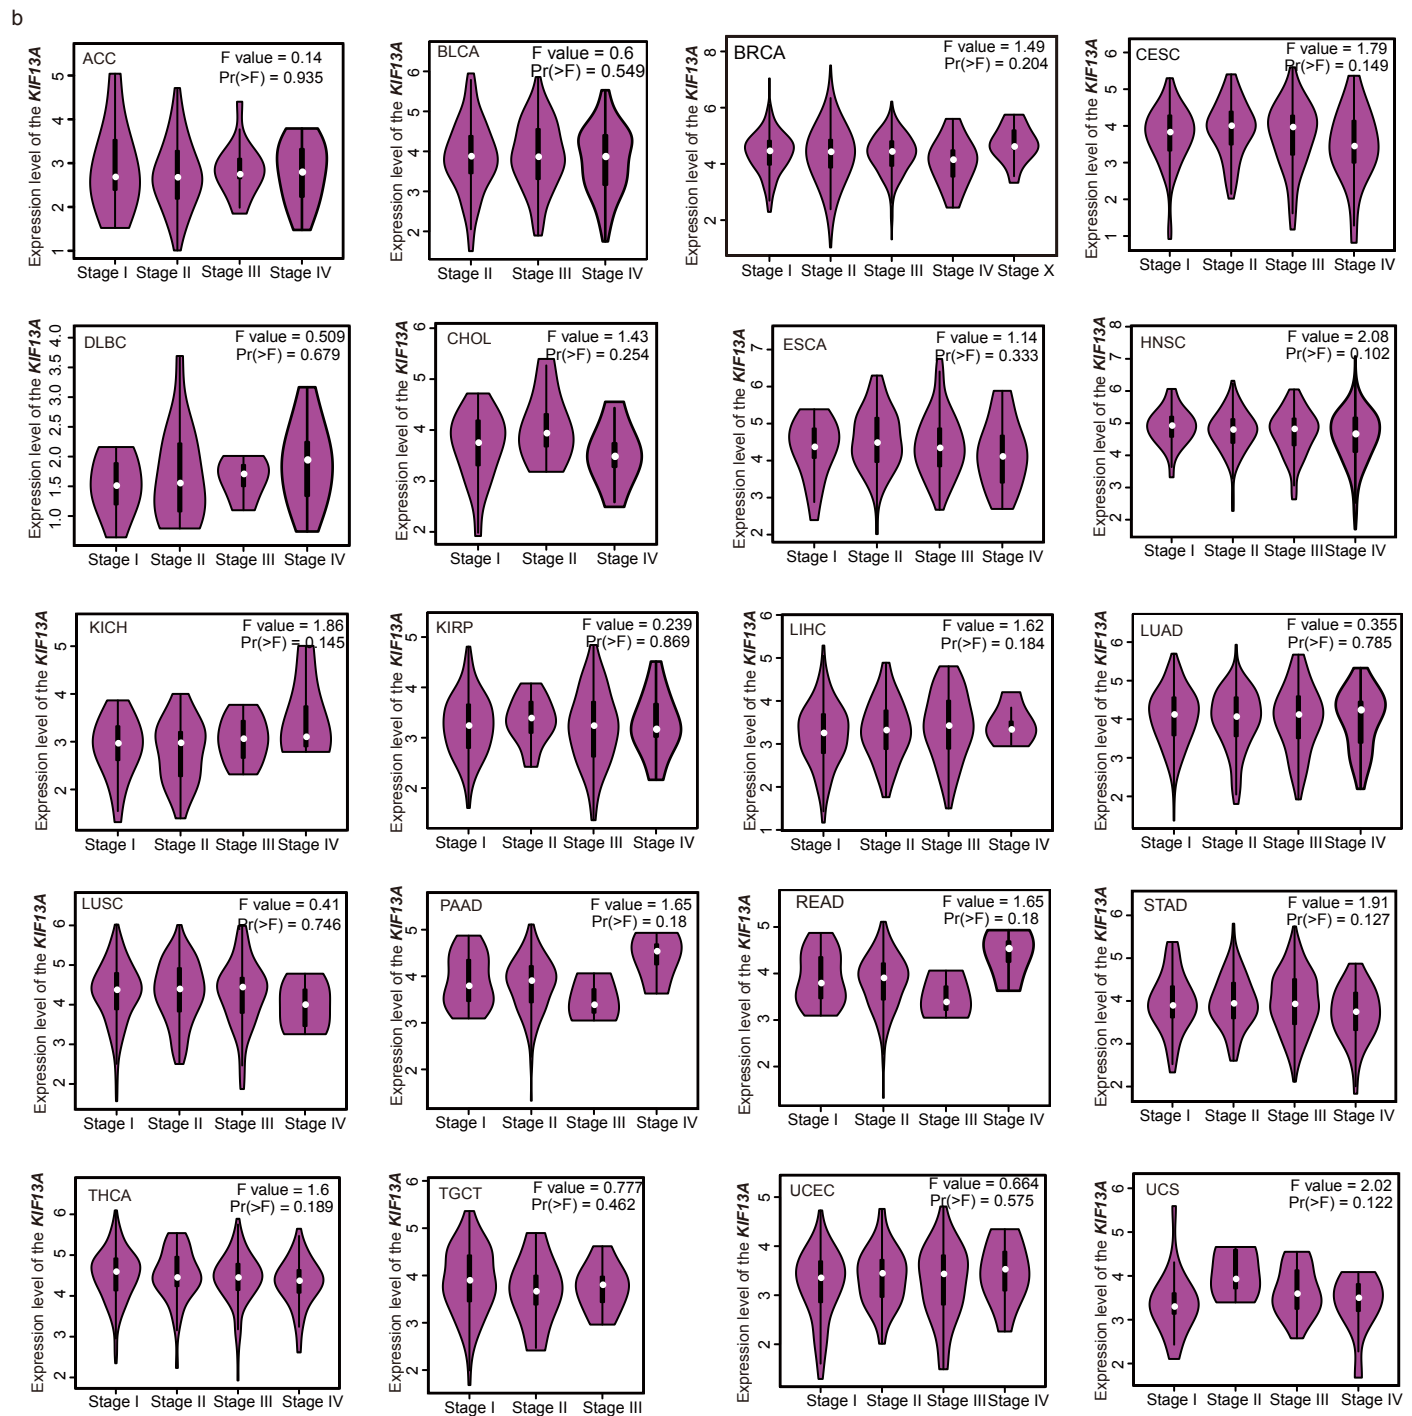

Supplement: Supplementary file 1 [file c82f4c743906293af99ed9b8.pdf]
